1 Full title

2 **Public-private mix in health systems and repercussions for health inequalities in Latin**  
3 **American countries: a scoping review protocol**

4

5 Short title

6 **A scoping review protocol for the public-private mix in Latin American health systems**

7

8 Eduarda Ferreira dos Anjos<sup>1,2\*</sup>, Suelen Carlos de Oliveira<sup>1</sup>, Adriana Mendoza-Ruiz<sup>1</sup>, Maria del  
9 Pilar Flores-Quispe<sup>2</sup>, Adelyne Maria Mendes Pereira<sup>1</sup>, Carl Kendall<sup>3</sup>, Ligia Regina Franco  
10 Sansigolo Kerr<sup>3</sup>, Naiá Ortelan<sup>2</sup>, Elzo Pereira Pinto Junior<sup>2</sup>, Natalia Romero<sup>4</sup>, Alastair Leyland<sup>5</sup>,  
11 Mauricio Lima Barreto<sup>2</sup>, Cristiani Vieira Machado<sup>2</sup>, on behalf of the Unit on the Social and  
12 Environmental Determinants of Health Inequalities (SEDHI).

13

14 <sup>1</sup> National School of Public Health (ENSP), Oswaldo Cruz Foundation, Rio de Janeiro, Rio de  
15 Janeiro, Brazil.

16

17 <sup>2</sup> Centre for Data and Knowledge Integration for Health (CIDACS), Oswaldo Cruz Foundation,  
18 Salvador, Bahia, Brazil.

19

20 <sup>3</sup> School of Medicine, Federal University of Ceará (UFC), Fortaleza, Ceará, Brazil.

21

22 <sup>4</sup> Universidad Internacional del Ecuador (UIDE), Quito, Pichincha, Ecuador.

23

24 <sup>5</sup> Social and Public Health Sciences Unit, University of Glasgow, Glasgow, Scotland, United  
25 Kingdom.

26

27 \*Corresponding author

28 e-mail: [eduarda.anjos@fiocruz.br](mailto:eduarda.anjos@fiocruz.br) (EFA)

29 Adress: CIDACS - Parque Tecnológico da Edf. Tecnocentro, R. Mundo, 121 - sala 315 -

30 Trobogy, Salvador - BA, 41745-715

31 **NOTE: This preprint reports new research that has not been certified by peer review and should not be used to guide clinical practice.**

## 32 **Abstract**

## 33 **Introduction**

34 Health system models in Latin American countries express differences in the state's role  
35 in regulating, financing and providing health services, as well as in the coexistence of different  
36 care arrangements involving public and private entities. This scoping review will seek to  
37 identify evidence on how the different public-private configurations of health systems influence  
38 health inequalities in Latin America.

## 39 **Methods and Analysis**

40 This protocol will be guided by the scoping review methodology developed by the  
41 Joanna Briggs Institute. The results will be presented according to the PRISMA-ScR protocol.  
42 Searches will be carried out on the Scielo, Lilacs, Embase, Pubmed, Web of Science and Scopus  
43 databases. The inclusion criteria will be publications whose central theme is the public-private  
44 mix of health systems in Latin America between January 2000 and March 2024. Exclusion  
45 criteria will be clinical trials, incomplete studies or in the design phase, duplicate publications,  
46 pre-print studies and gray literature (interim reports, unpublished texts, dissertations, and  
47 theses. The steps for carrying out the scope review will: (1) identifying the research question;  
48 (2) identifying relevant studies; (3) study selection; (4) charting the data; and (5) collating,  
49 summarizing, and reporting the results. Two independent reviewers will select the articles. The  
50 results will be described, analyzed, and categorized through narrative synthesis, correlating  
51 with the research objectives and questions.

## 52 **Expected results**

53 It is hoped that this scoping protocol will provide a comprehensive framework for  
54 investigating the gaps in the current literature on the public-private mix in Latin America and  
55 the effects on health inequalities.

56 **Link to the protocol record in the Open Science Framework (OSF):**

57 [https://osf.io/rkzx3/?view\\_only=4594a2c52f2d47128d805fdd9dd1359b](https://osf.io/rkzx3/?view_only=4594a2c52f2d47128d805fdd9dd1359b).

## 58 **Introduction**

59 Health systems in Latin American countries have been structured in various ways  
60 throughout the 20th century, generally involving a strand of collective public health actions and  
61 another of medical care aimed at workers in the formal labour market. Throughout their history,  
62 the consolidation of these systems has been hampered by economic restrictions, democratic  
63 instability, social inequality, and widespread informality in the labour market <sup>1</sup>. The diversity  
64 of ethnic and cultural characteristics, the population's lifestyles (urban, rural, and remote rural)  
65 and the socioeconomic level of the population in the different nations of Latin America add to  
66 the challenges for health systems <sup>2</sup>.

67 Reforms adopted over the years in various regional countries expanded the private  
68 health sector under state incentives associated with new business dynamics, resulting in a  
69 complex public-private mix <sup>3, 4, 5</sup>. This complexity is expressed in the segmentation of the  
70 population according to their affiliation to services, the composition of the supply of care, health  
71 spending, the diversity of providers working in the sector, the multiplicity of health  
72 professionals' ties, as well as the different coverage and access between groups according to  
73 their ability to pay or pay directly for services <sup>6, 7, 2</sup>.

74 In addition, there are historical-structural challenges in the organization, financing, and  
75 provision of health systems in Latin America, which have recently been highlighted by the  
76 COVID-19 pandemic, which has exacerbated the inequalities and weaknesses of these systems,  
77 revealing their limitations and potential <sup>8, 9, 10</sup>. In this sense, understanding public-private health  
78 arrangements in Latin America over the last few decades and considering the impacts of the  
79 recent pandemic can help direct public policies with a focus on state-market relations. Thus,

80 this protocol proposes a scoping review to identify and explore the evidence on the effects of  
81 the public-private mix of health systems on health inequalities in Latin America.

## 82 **Methods and Analysis**

83 The review will cover the period from 2000 to 2024. The time frame is justified because  
84 it covers more than two decades marked by changes in various health systems in Latin America  
85 but with persistent health inequalities. The scoping review technique was selected for its  
86 potential in mapping complex and heterogeneous literature, considering the particular contexts  
87 of Latin American countries, as well as being useful for providing decision-makers with  
88 information on how the topic has developed over time, as well as gaps and the need to  
89 strengthen public policy agendas.

90 The construction of this protocol was based on internationally recognized and validated  
91 scoping review guidelines, as well as articles in the field of public health that have adopted this  
92 methodological design. This review follows the Joanna Briggs Institute (JBI) and the Preferred  
93 Reporting Items for Systematic Reviews and Meta-Analyses Extension for Scoping Reviews  
94 (PRISMA-ScR) and will follow the following methodological steps: (1) identifying the research  
95 question; (2) identifying relevant studies; (3) study selection; (4) charting the data; and (5)  
96 collating, summarizing and reporting the results.

97 This protocol was registered on the Open Science Framework platform following the  
98 JBI recommendation, to conduct an impartial review, avoid duplication of research, and  
99 guarantee the originality of the work. It can be consulted via the register:

100 [https://osf.io/rkzx3/?view\\_only=4594a2c52f2d47128d805fdd9dd1359b](https://osf.io/rkzx3/?view_only=4594a2c52f2d47128d805fdd9dd1359b).

101

## 102 **Step 1: Identifying the research question**

103 Public-private relations in health systems and their implications for health inequalities  
104 in Latin America are the focus of this review. In particular, the participation and arrangements  
105 between the public and private sectors in the financing, coverage, and provision of services will  
106 be highlighted. The focus, question and hypothesis of this work are detailed in Box 1.

107

### 108 **Box 1. Focus, question, and hypothesis of this scoping review.**

109

110 The construction of the research questions was based on the PCC mnemonic, where 'P'  
111 represents the population, 'C' the concept and 'C' the context. The 'population' was taken to be  
112 the equivalent of the unit of analysis for public health (in this case, "Health Systems"). For the  
113 context, in addition to the term Latin America, seven countries were included in the  
114 bibliographic search: Argentina, Brazil, Chile, Colombia, Ecuador, Mexico and Peru (Box 2).

115

### 116 **Box 2. Population (P), Concept (C) and Context (C).**

117

118 The seven countries were selected because they are populous and concentrate most of  
119 the region's publications, as well as because they meet criteria of interest for the analysis, such  
120 as the persistence of significant socioeconomic inequalities and the presence of varied health  
121 system arrangements, including the universal model, the social insurance model, and different  
122 private sector financing and provision models.

123

124 The health systems of the seven countries selected for the study are briefly described in  
Box 3, covering coverage, regulation, financing and system organization. Of these, three are

125 federal countries (Argentina, Mexico and Brazil) and four are unitary republics (Chile,  
126 Colombia, Peru and Ecuador).

127

### 128 **Box 3. General characteristics of Health Systems in seven** 129 **countries of Latin America.**

130

131 The seven countries show different levels of socioeconomic and health inequalities. The  
132 data related to the Gini coefficient reiterates the socioeconomic disparities in Latin American  
133 countries. In 2020, the average coefficient was 0.46 for the entire region. Ecuador (0.46) and  
134 Peru (0.46) have indicators similar to or close to the regional average, making it clear that they  
135 face different gradients of inequalities in terms of health and socioeconomic conditions. Mexico  
136 (0.45) showed the smallest difference between the richest and poorest sections of its population.  
137 In contrast, Colombia (0.55), Brazil (0.51) and Chile (0.47) stood out for their greater  
138 concentration of income, making them among the most unequal countries in the world <sup>35</sup>.

139 The Latin American federations, Brazil represents the case of a universal health system,  
140 based on a comprehensive conception of social security, with many differences in access to  
141 health between regions of the country and a strong presence of the private sector; while Mexico  
142 has a social insurance system, with high private spending through direct disbursement by  
143 families. The Argentine system has maintained its corporate base, with the presence of the  
144 private sector in the provision of services and the existence of specific public programs <sup>6</sup>.

145 Chile and Colombia are illustrative cases of neoliberal reforms that radically altered the  
146 role of the state and markets in health. In Chile, the reform began at the end of the 1970s under  
147 the military dictatorship, resulting in a dual system. In Colombia, in the 1990s, under a  
148 democratic regime, the Structured Pluralism model was implemented <sup>24, 19</sup>. Ecuador and Peru

149 are characterized by mixed systems, with a weakened public sector compared to the private  
150 sector <sup>31, 32, 33, 29, 30, 27</sup>.

151

## 152 **Step 2: Identifying relevant studies**

### 153 **Data sources**

154 The search for scientific articles will be carried out in six databases: Lilacs via the  
155 Biblioteca Virtual de Saúde (BVS in Portuguese); Embase; Pubmed; Scielo; Web of Science;  
156 and Scopus. Access to the Web of Science and Scopus databases will be via the Portal de  
157 Periódicos Capes (in Portuguese). In addition, references relevant to the topic will be included  
158 in the articles found.

### 159 **Search strategy**

160 The search will be carried out using a main search strategy which will be adapted for  
161 each database according to the PCC and the defined inclusion and exclusion criteria. The search  
162 strategies for the three databases with controlled vocabulary, Lilacs/BVS, Embase and Pubmed,  
163 will use the English language descriptors indexed: Descriptors in Health Sciences (Decs in  
164 Portuguese), Emtree term and Medical Subject Headings (MESH), respectively (Box 4). In the  
165 other databases, the strategy will exclusively use keywords (Appendix).

166

### 167 **Box 4. Search terms.**

168

## 169 **Step 3: Study selection**

170 After searching in the descriptor and/or keyword fields (depending on the database), the  
171 texts will first be screened by reading the title and abstract and then by reading the full text.

172 The selection of the documents to be included in this scope review at each stage will be  
173 carried out by two reviewers independently. Any disagreements will be resolved by consensus  
174 or by decision of a third reviewer. To increase uniformity and accuracy, all reviewers will first  
175 carry out a calibration exercise. Subsequently, reviewers in pairs will independently analyze all  
176 the records using the Rayyan platform (<https://www.rayyan.ai/>). Full articles that meet the  
177 inclusion criteria established for the study will be selected and examined in detail.

178 Monitoring of the study selection process will be detailed in a flowchart (according to  
179 PRISMA-ScR guidelines), according to the identification, selection, eligibility, and inclusion  
180 stages. The search results will be managed using the 'Zotero' software to collect, store and  
181 organize the references. Using the reference manager will allow for organization into different  
182 groups, facilitating sharing with the researchers participating in this study.

### 183 **Inclusion criteria**

184 This review will consider publications whose central theme is the public-private mix of  
185 health systems in Latin America (especially those dealing with Brazil, Ecuador, Mexico, Chile,  
186 Colombia, Peru and Argentina, individually or comparatively with other countries), published  
187 between January 2000 and March 2024.

188 The identification and selection of relevant publications will include the following types  
189 of documents: essays, qualitative and quantitative research (case studies, ecological, cross-  
190 sectional and time series studies), analysis and evaluation of health policies and systems,  
191 published in English, Portuguese, and Spanish.

192 Only open-access scientific articles published in journals indexed in the aforementioned  
193 databases will be included, as they undergo peer review. Theses and dissertations will not be  
194 included (since their end product is usually scientific articles published in journals) and books  
195 or chapters (the databases selected are incomplete for such works, and not all are peer-reviewed  
196 and open access).



## 197 **Exclusion criteria**

198 Clinical trials, incomplete studies or in the design phase, duplicate publications, pre-  
199 print studies, systematic reviews, narrative reviews and gray literature (interim reports,  
200 unpublished texts, dissertations and theses) will be excluded.

201

## 202 **Step 4: Charting the data**

203 The search strategy will be carried out in three stages: (1) Initial search in two databases;  
204 (2) Identification of terms to be included, enrichment of the search strategy and search in the  
205 other databases; and (3) Review of references of included documents to track down and evaluate  
206 the inclusion of other works. This strategy will be guided by a data extraction form developed  
207 electronically to extract the information, which will be filled in independently by two  
208 researchers and then converted into a file with a format compatible with the Microsoft Excel®  
209 program. The file generated will be the database to be used in the subsequent phase of this  
210 review and will contain information identifying the study (title, first author, year, objectives,  
211 study design, funding) and data related to the research questions (geographical  
212 context/countries).

213 In this way, the following information will be mapped by the reviewers: characteristics  
214 and details of the study (title, first author, year, country, objectives and study design) and data  
215 related to the research questions (public-private configuration in financing, coverage and  
216 provision of services, as well as repercussions for health inequalities and response to covid-19).

217

## 218 **Step 5: Collating, summarizing and reporting the results**

219 A descriptive analysis of the included studies will be carried out using the concepts  
220 described in the form used to extract the data and other characteristics relevant to the findings.

221 The content of the findings will be categorized into "financing models", "service coverage",  
222 "public-private mix in the provision of services" and "repercussions on health inequalities".

223 The results will be summarized to return to the research question and the proposed  
224 objective. The scoping review by Nyanhoka et al <sup>36</sup> will be used as a reference to choose the  
225 appropriate resources for presenting the results.

226

## 227 **Ethical considerations**

228 This research does not require ethical approval because the data used are scientific  
229 articles published in indexed journals.

230

## 231 **Disseminations of Knowledge**

232 This scoping protocol will provide a comprehensive framework for investigating the  
233 gaps in the current literature on the public-private mix in Latin America and the effects on  
234 health inequalities, guided by the guidelines recommended by the Joanna Briggs Institute and  
235 the PRISMA-ScR protocol. This evaluation will provide tools and evidence to policymakers of  
236 the public-private mix in Latin America and the effects on health inequalities. We will  
237 disseminate the data in scientific journals, reports, and policy briefings targeting policymakers  
238 and civil society.

239

## 240 **References**

241

242 1. Huber E, Niedzwiecki S. Emerging welfare states in Latin America and East Asia. In  
243 Leibfried S., Nullmeier F., Huber E., Lange M., Levy J., Stephens J. D. (Eds.), The Oxford

244 handbook of transformations of the state (pp. 796-812). Oxford, UK: Oxford University Press,  
245 2015.

246

247 2. PAHO/WHO (ed.). Analizar y superar las barreras de acceso para fortalecer la atención  
248 primaria de salud. Washington, DC: Organización Panamericana de la Salud Oficina Sanitaria  
249 Panamericana: Oficina Regional de la Organización Mundial de la Salud, 2023. Disponible  
250 em: <https://iris.paho.org/handle/10665.2/57803>. Acesso em: 15 jul 2023.

251

252 3. Bustamante A, V.; Meéndez, C. A. Health care privatization in Latin America: Comparing  
253 divergent privatization approaches in Chile, Colombia, and Mexico. *Journal of Health  
254 Politics, Policy and Law*, v. 39, n. 4, p. 841–886, 2014.

255

256 4. Giovanella L, Almeida PF de. Atenção primária integral e sistemas segmentados de saúde  
257 na América do Sul. *Cad Saúde Pública*. 2017;33:e00118816. [https://doi.org/10.1590/0102-  
258 311X00118816](https://doi.org/10.1590/0102-311X00118816).

259

260 5. Weyland, K. The performance of Leftist Governments in Latin America: Conceptual and  
261 Theoretical Issues. In: Weyland, Kurt; Madrid, Raúl; Hunter, Wendy. *Leftist governments in  
262 Latin American: successes and shortcomings*. Cambridge, 2010.

263

264 6. Machado CV. Health Policies in Argentina, Brazil and Mexico: different paths, many  
265 challenges. *Cien Saude Colet.*;23(7):2197–21, julho de 2018.

266

- 267 7. Báscolo E, Houghton N, Del Riego A. Leveraging household survey data to measure  
268 barriers to health services access in the Americas. *Revista Panamericana de Salud Pública*.44;  
269 1.15 de agosto de 2020.  
270
- 271 8. Machado CV, Pereira AMM, Freitas CM, eds. Políticas e sistemas de saúde em tempos de  
272 pandemia: nove países, muitas lições [online]. Rio de Janeiro, RJ: Observatório Covid-19  
273 Fiocruz; Editora Fiocruz; 2022.  
274
- 275 9. Prado NMBL, Freitas CAM, Nunes FG, Figueroa CDO, Pereira GE, Moraes MB, et al..  
276 Respostas governamentais heterogêneas no enfrentamento da pandemia da COVID-19 por  
277 países da América Latina. *Ciênc saúde coletiva*.28(3):665–83; 2023.  
278
- 279 10. Dos Santos IDM, Machado CV, Pereira AMM, de Andrade CLT. Covid-19 na América  
280 Latina: desigualdades e capacidades de resposta dos sistemas de saúde a emergências  
281 sanitárias. *Rev Panam Salud Publica*. Jun 12;47:e88; 2023.  
282
- 283 11. Lobato LVC, Giovanella L. Atenção Primária à Saúde. In: Giovanella L. et al. (Orgs.)  
284 Políticas e sistemas de saúde no Brasil. Rio de Janeiro: Editora Fiocruz, 2012. p. 89–120.  
285
- 286 12. Bahia L. A privatização no sistema de saúde brasileiro nos anos 2000: tendências e  
287 justificação. In: Santos NR, Amarante PDC. (Orgs.) Gestão Pública e Relação Público  
288 Privado na Saúde. Rio de Janeiro: Cebes, 2010. p. 115–128.  
289
- 290 13. McCartney G, Popham F, McMaster R, Cumbers A. Defining health and health  
291 inequalities. *Public Health*. 2019;172: p. 22-30.

292

293 14. Ministerio de la Salud. Coberturas de Salud en Argentina, año 2022. Ministerio de Salud  
294 de la Nación, Secretaría de Equidad: Buenos Aires, may 2023. Disponível em:  
295 [https://bancos.salud.gob.ar/sites/default/files/2023-06/coberturas-de-salud-en-argentina-2022-](https://bancos.salud.gob.ar/sites/default/files/2023-06/coberturas-de-salud-en-argentina-2022-deiss.pdf)  
296 [deiss.pdf](https://bancos.salud.gob.ar/sites/default/files/2023-06/coberturas-de-salud-en-argentina-2022-deiss.pdf). Acesso em: 15 jul 2023.

297

298 15. González Block MA., Reyes Morales H., Cahuana Hurtado L., Balandrán A., Méndez E.,  
299 Mexico Health System Review. Health Systems in Transition. European Observatory of  
300 Health Systems and Policies, World Health Organization. 2020; 22(2): p. i-222.

301

302 16. Reich MR. Politics and Policies of Health Systems: Reflections on 50 Years of Observing  
303 Protests, Leaders, and Political Analysis. Health Systems & Reform. 2023; 9:1.  
304 <https://doi.org/10.1080/23288604.2020.1763114>.

305

306 17. Escorel S. História das políticas de saúde no Brasil de 1964 a 1990: do golpe militar à  
307 Reforma Sanitária. In: Giovanella L, Escorel S, Lobato LVC, Noronha JC, Carvalho AI,  
308 (org.). Políticas e Sistema de Saúde no Brasil. segundo edição. Rio de Janeiro: Editora  
309 Fiocruz. Cap. 10, 2012, p.323-364.

310

311 18. Sestelo JAF, Bahia L, Lecovitz E. Crise global e sistemas de saúde na América Latina.  
312 Edufba: Salvador, 2022. p.319.

313

314 19. Soto RA, Leal, MCH; Zelada, LG. El derecho a la salud y su (des)protección en el estado  
315 subsidiario. Estudios constitucionales [online]. 2016, vol.14, n.1, p.95-138.

316

- 317 20. Giedion U, Villar M, Ávila A. Los sistemas de salud em Latinoamérica y el papel del  
318 seguro privado. Fundación MAPFRE: Madrid, 2010. 353 p.  
319
- 320 21. Cid C, L. Prieto. Gasto de bolsillo en salud: el caso de Chile 1997 y 2007. Revista  
321 Panamericana de Salud Pública, 2012; 31(4), p. 310-16.  
322
- 323 22. Oliveira SC, Machado CV, Hein ARA, Almeida PF. Relações público-privadas no  
324 sistema de saúde do Chile: regulação, financiamento e provisão de serviços. Ciênc saúde  
325 coletiva. 2021;26(10):4529–40.  
326
- 327 23. Lefio Celedón, Álvaro. Salud, Democracia y Proceso Constituyente en Chile. Revista  
328 Chilena De Salud Pública, 2023, p. 124–134.  
329
- 330 24. Hernández, M. Reforma sanitária, equidad y derecho a la salud en Colombia. Cad. de  
331 saúde publica. 2002; 18 (4) : 991 – 1001 Disponível:  
332 <https://sites.usp.br/iberoamericanoralhealth/perfil/mexico/sistema-de-saude-mexico/>. Acesso  
333 em: 15 jul 2023.  
334
- 335 25. Luzuriaga, MJ. Privados de la salud: las políticas de privatización de los sistemas de salud  
336 en Argentina, Brasil, Chile y Colombia. 1ª ed. São Paulo: Hucitec, 2018.  
337
- 338 26. Cárdenas WIL, Pereira AMM, Machado CV. Trajetória das relações público-privadas no  
339 sistema de saúde da Colômbia de 1991 a 2015. Cad Saúde Pública. 2017;33:e00114016.  
340 <https://doi.org/10.1590/0102-311X00114016>.  
341

- 342 27. Goyenechea, M. y F. Ruiz. Multinacionales en América Latina: una caracterización a  
343 partir del sector salud en Brasil, México, Colombia, Perú, Paraguay y Chile, Fundación Nodo  
344 XXI [en línea], 2020. Disponible em: [https://www.nodoxi.cl/publicaciones/multinacionales-](https://www.nodoxi.cl/publicaciones/multinacionales-en-america-latina/)  
345 [en-america-latina/](https://www.nodoxi.cl/publicaciones/multinacionales-en-america-latina/). Acceso em: 15 jul 2023.
- 346
- 347 28. Instituto Suramericano de Gobierno en Salud. Giovanella, L; Feo, O; Faria, M; Tobar, S.  
348 (orgs.). Sistemas de Salud em Suramérica: desafíos para la universalidad, la inequidad y la  
349 equidad. Rio de Janeiro: ISAGS, 2012.
- 350
- 351 29. Alcalde-Rabanal JE, Lazo-González O, Nigenda G. Sistema de salud de Perú. Salud  
352 pública Méx. 2011; 53(Suppl 2): s243-s254. Disponible em:  
353 [http://www.scielo.org.mx/scielo.php?script=sci\\_arttext&pid=S0036-](http://www.scielo.org.mx/scielo.php?script=sci_arttext&pid=S0036-36342011000800019&lng=es)  
354 [36342011000800019&lng=es](http://www.scielo.org.mx/scielo.php?script=sci_arttext&pid=S0036-36342011000800019&lng=es). Acceso em: 3 jul 2023.
- 355
- 356 30. Madies CV, Chiarvetti S, Chorny M. Aseguramiento y cobertura: Dos temas críticos en  
357 las reformas del sector de la salud. Rev Panam Salud Publica/Pan Am J Public Heal.  
358 2000;8(1-2):33-42.
- 359
- 360 31. Iturralde P. Privatización de la Salud en Ecuador: Estudio de la interacción pública con  
361 clínicas y hospitales privados. Quito: Plataforma por el Derecho a la Salud/CDES; 2015.
- 362
- 363 32. Lucio R, Villacrés N, Henríquez R. Sistema de salud de Ecuador. Salud pública Méx.  
364 2011; 53 (Suppl 2): s177-s187. Disponible em:  
365 [http://www.scielo.org.mx/scielo.php?script=sci\\_arttext&pid=S0036-](http://www.scielo.org.mx/scielo.php?script=sci_arttext&pid=S0036-36342011000800013&lng=es)  
366 [36342011000800013&lng=es](http://www.scielo.org.mx/scielo.php?script=sci_arttext&pid=S0036-36342011000800013&lng=es). Acceso em: 15 jul 2023.

367

368 33. Dávalos Aguilar P. Salud Inc. Monopolio, ganancia y asimetrías de la información en el  
369 aseguramiento privado de la salud en el Ecuador. Quito: Pontificia Universidad Católica del  
370 Ecuador; 2016.

371

372 34. World Health Organization. The Global Health Observatory. Disponível em:  
373 [https://www.who.int/data/gho/data/indicators/indicator-details/GHO/domestic-general-](https://www.who.int/data/gho/data/indicators/indicator-details/GHO/domestic-general-government-health-expenditure-(gche-d)-as-percentage-of-current-health-expenditure)  
374 [government-health-expenditure-\(gche-d\)-as-percentage-of-current-health-expenditure](https://www.who.int/data/gho/data/indicators/indicator-details/GHO/domestic-general-government-health-expenditure-(gche-d)-as-percentage-of-current-health-expenditure). Acesso  
375 em: 15 jul 2023.

376

377 35. Cepal. Bases de Datos y Publicaciones Estadísticas. CEpalStat. Disponível em:  
378 <https://statistics.cepal.org/portal/cepalstat/dashboard.html?theme=1&lang=es>. Acesso em: 15  
379 jul 2023.

380

381 36. Nyanhoka L, Tudur-Smith C, Thu VN, Iversen V, Tricco AC, Porcher R. A scoping  
382 review describes methods used to identify, prioritize and display gaps in health research.  
383 Journal of Clinical Epidemiology. maio de 2019;109:99–110.

384

## 385 **Declarations**

## 386 **Ethics approval and consent to participate**

387 Not applicable.

## 388 **Availability of data and materials**

389 Not applicable.



## 390 **Competing interests**

391 The authors declare that there are no competing financial or non-financial interests to  
392 report.

## 393 **Acknowledgments**

394 The authors would like to acknowledge the Unit on the Social and Environmental  
395 Determinants of Health Inequalities (SEDHI) by funding through research grants.

## 396 **Funding**

397 This research was funded by the NIHR (NIHR134801) using UK aid from the UK  
398 Government to support global health research. The views expressed in this publication are  
399 those of the author(s) and not necessarily those of the NIHR or the UK government.

## 400 **Author's contribution**

401 Anjos EF, Oliveira SC, Pereira AMM and Mendoza-Ruiz A designed the scoping  
402 review. Anjos EF, Oliveira SC, Pereira AMM, Mendoza-Ruiz A, Flores-Quispe MDP, Pinto  
403 Junior EP and Machado CV built the protocol and method. Anjos EF, Oliveira SC, Pereira  
404 AMM, Mendoza-Ruiz A, Flores-Quispe MDP, Kendall BC, Kerr LRFS, Ortelan N, Pinto  
405 Junior EP, Romero N, Leyland A, Barreto ML and Machado CV, drafted the manuscript. All  
406 authors approved the final version of the manuscript.
